# Supplementary material for: Transcriptome analysis in non-model species: a new method for the analysis of heterologous hybridization on microarrays
Source: Springer Nature journal article supplement (doi:10.1186/1471-2164-11-344), 2010-05-31

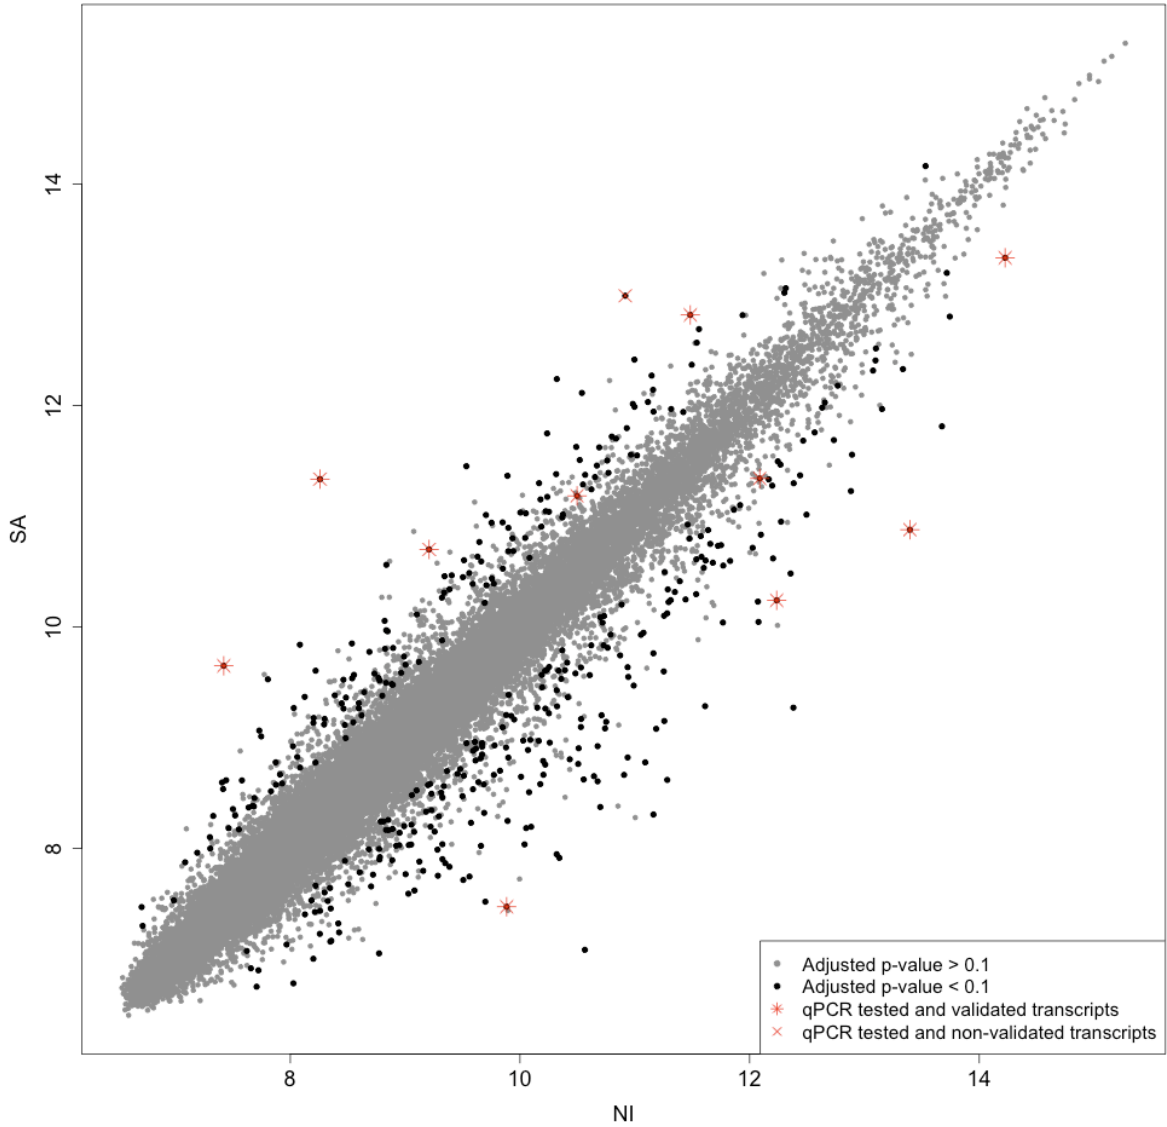

Supplement: 12864_2009_2938_MOESM8_ESM.pdf [file 12864_2009_2938_MOESM8_ESM.pdf]
